# 1 The relationship of early-life diseases with lifetime childlessness: Evidence 2 from Finland and Sweden

3 Aoxing Liu<sup>1,2</sup>, Evelina T Akimova<sup>3</sup>, Xuejie Ding<sup>3</sup>, Sakari Jukarainen<sup>1</sup>, Pekka Vartiainen<sup>1</sup>,  
4 Tuomo Kiiskinen<sup>1,4</sup>, Sara Kuitunen<sup>1</sup>, Aki S Havulinna<sup>1,4</sup>, Mika Gissler<sup>4,5,6,7</sup>, Stefano  
5 Lombardi<sup>8</sup>, Tove Fall<sup>9</sup>, Melinda C Mills<sup>3,10,11\*</sup>, Andrea Ganna<sup>1,2,12\*</sup>

6  
7 <sup>1</sup>Institute for Molecular Medicine Finland, FIMM, University of Helsinki, Helsinki, Finland.

8 <sup>2</sup>Program in Medical and Population Genetics, Broad Institute of MIT and Harvard,  
9 Cambridge, MA, USA.

10 <sup>3</sup>Leverhulme Centre for Demographic Science and Nuffield College, University of Oxford,  
11 Oxford, United Kingdom.

12 <sup>4</sup>Finnish Institute for Health and Welfare, THL, Helsinki, Finland.

13 <sup>5</sup>Research Centre for Child Psychiatry and Invest Research Flagship, University of Turku,  
14 Turku, Finland.

15 <sup>6</sup>Academic Primary Health Care Centre, Stockholm, Sweden.

16 <sup>7</sup>Department of Molecular Medicine and Surgery, Karolinska Institutet, Stockholm, Sweden.

17 <sup>8</sup>Institute for Economic Research, VATT, Finland.

18 <sup>9</sup>Molecular Epidemiology, Department of Medical Sciences, and Science for Life Laboratory,  
19 Uppsala University, Uppsala, Sweden.

20 <sup>10</sup>Department of Economics, Econometrics & Finance, Faculty of Economics and Business,  
21 University of Groningen, the Netherlands.

22 <sup>11</sup>Department of Genetics, University Medical Centre Groningen, the Netherlands.

23 <sup>12</sup>Analytic and Translational Genetics Unit, ATGU, Massachusetts General Hospital, Boston,  
24 MA, USA.

25

26 \*Corresponding authors: Melinda C Mills ([melinda.mills@demography.ox.ac.uk](mailto:melinda.mills@demography.ox.ac.uk)) and Andrea  
27 Ganna ([aganna@broadinstitute.org](mailto:aganna@broadinstitute.org)).

28 **NOTE: This preprint reports new research that has not been certified by peer review and should not be used to guide clinical practice.**

## 29 **Abstract**

30 The percentage of women born 1965-1975 remaining childless is ~20% in many Western  
31 European and ~30% in some East Asian countries. Around a quarter of childless women do  
32 that voluntarily, suggesting a remaining role for disease. Single diseases have been linked to  
33 childlessness, mostly in women, yet we lack a comprehensive picture of the effect of early-  
34 life diseases on lifetime childlessness. We examined all individuals born 1956-1968 (men)  
35 and 1956-1973 (women) in Finland (n=1,035,928) and Sweden (n=1,509,092) to completion  
36 of reproduction in 2018 (age 45 women; 50 men). Leveraging nationwide registers, we  
37 associated sociodemographic and reproductive information with 414 diseases across 16  
38 categories, using a population and matched pair case-control design of siblings discordant for  
39 childlessness (71,524 full-sisters, 77,622 full-brothers). The strongest associations were  
40 mental-behavioural, particularly amongst men (schizophrenia, acute alcohol intoxication),  
41 congenital anomalies and endocrine-nutritional-metabolic disorders (diabetes), strongest  
42 amongst women. We identified novel associations for inflammatory (e.g., myocarditis) and  
43 autoimmune diseases (e.g., juvenile idiopathic arthritis). Associations were dependent on age  
44 at onset, earlier in women (21-25 years) than men (26-30 years). Disease association was  
45 mediated by singlehood, especially in men and by educational level. Evidence can be used to  
46 understand how disease contributes to involuntary childlessness.  
47

## 48 **Text box: Defining Childlessness**

49 We use the term childlessness to describe individuals that have had no live-born children by  
50 the end of their reproductive lifespan (age 45 for women; 50 for men). Childlessness is  
51 defined in the literature as being both involuntary, related to biology and fecundity (e.g.,  
52 infertility, inability to find a partner) and voluntary or ‘childfree’<sup>1</sup> (e.g., active choice,  
53 preference<sup>2</sup>). It has been estimated that 4-5% of the current 15-20% women who are childless  
54 in Europe are voluntary childless<sup>3</sup>. Childless individuals are subjected to discrimination and  
55 marginalization in many societies<sup>4</sup>, with infertile women globally experiencing multiple types  
56 of violence and coercion<sup>5</sup>. A parallel line of work, which is not the position of this paper or  
57 authors, is to problematize and stigmatize childless individuals as egoistic and place blame on  
58 this group for producing a so-called ‘demographic disaster’ of shrinking and ageing  
59 populations and collapse of social security systems<sup>6</sup>. The approach of this paper is to provide  
60 a neutral, data-driven, and factual examination of early-life diseases related to childlessness,  
61 with the aim to design a better understanding of health to prevent childlessness among those  
62 who want to have children.

63

## 64 **Main**

65 In Western European countries, around 20% of women born around 1965 remained childless,  
66 with the highest levels of permanent childlessness now in East Asia, ranging from 28%  
67 (Japan) to 35% (Hong Kong) for women born in 1975<sup>7,8</sup>. There has also been a sharp increase  
68 in childlessness over the last decades in countries such as in Finland, increasing since the  
69 1970s from 14% to 22% (women aged 40 years) and 22% to 32% (men)<sup>9,10</sup>. Demographic  
70 research has isolated core factors linked to the rise in contemporary levels of childlessness.  
71 Access to effective contraception at the end of the 1960s in many countries and more  
72 recently, emergency post-coital contraception in the late 1990s, provided couples with more  
73 abilities to control their reproduction<sup>7</sup>. Women’s opportunities also vastly changed in many  
74 industrialised nations since the 1980s, with gains in higher levels of education and entry into  
75 the labour market accompanied with shifts in gender norms and equity<sup>11,12</sup>. At the same time,  
76 couples faced work-life reconciliation constraints when planning to have children including  
77 lack of access to childcare, challenging housing conditions, economic uncertainty, inability to  
78 find a partner, and the general absence of supportive family policies<sup>12</sup>. Given that women  
79 entered the labour market while still taking on the bulk of household labour, this ‘incomplete

80 gender revolution' resulted in women often being forced to decide between a career and  
81 parenthood<sup>13,14</sup>. Higher levels of job strain and lack of work-life reconciliation has also been  
82 found to reduce fertility intentions<sup>15</sup>. Another shift has been the growth of precarious,  
83 temporary, and uncertain employment, leading many to postpone or forgo entering  
84 partnerships and parenthood<sup>16,17</sup>. Many of these changes resulted in a general postponement  
85 of children to later ages<sup>12</sup>. This in turn meant that individuals were having children at ages  
86 when they had lower fecundity (reproductive capacity), leading to infertility-related issues  
87 and having fewer children<sup>18</sup>. This also resulted in an increase in involuntary childlessness  
88 (see **Text Box**).

89 Although economic, societal, and cultural freedom has been linked to individuals who  
90 remained 'childfree' or voluntarily childless<sup>19</sup>, the individuals who report that they never  
91 intended to have children, however, has remained low and is estimated to be around 5% in  
92 Europe<sup>3</sup>. Rather than being planned at an early age, becoming voluntarily childfree appears to  
93 be a mix of unforeseen circumstances, often related to postponement of childbearing and  
94 adaptation to a childfree life<sup>20,21</sup>. This makes the decomposition of measuring voluntary  
95 versus involuntary childlessness challenging. A longitudinal study measuring fertility  
96 intentions of childless women (questioned from age 14 to their late 40s) found that they  
97 engaged in repeated postponement of childbearing and the subsequent adoption of a childless  
98 expectation at older ages or had indecision about parenthood evidenced by changing childless  
99 expectations across various ages.

100 The majority of childless individuals are thus involuntarily childless and wanted to have  
101 children. From the standpoint of public health, involuntary childlessness may impact other  
102 health domains, with childless women more likely to suffer from relationship dissolution,  
103 lower levels of self-esteem and isolation, and higher risks of clinical depression<sup>12</sup>. A recent  
104 systematic review found that infertile women globally are also more likely to experience  
105 psychological, physical, and sexual violence as well as economic coercion<sup>5</sup>.

106 While the aforementioned demographic and socioeconomic literature has shown social,  
107 economic, and structural factors as having a major effect on childlessness, the fact that a large  
108 proportion of individuals are still involuntarily childless suggests that biology and diseases  
109 likely have a considerable influence on individuals' chances of being childless or having a  
110 particular number of children over their lifetime (**Figure S1**). First, diseases may directly  
111 influence childlessness through medical conditions that affect the fecundity, co-morbidities  
112 and mortality of the individual, as well as the risk of stillbirth<sup>22</sup>. Second, diseases can impact

113 selection into a partnership, which in turn lowers the chance of being partnered and thus  
114 having children<sup>23</sup>. Also, some may choose to be childfree due to knowledge or concerns of  
115 intergenerational transmission of certain known genetic conditions<sup>24</sup>. Finally, many diseases  
116 are associated with lower socioeconomic status, unemployment, and economic uncertainty,  
117 which may amplify the psychosocial impact of diseases on childlessness<sup>25</sup>.

118 A review of the literature linking disease to childlessness can be found in **Table S1**. Previous  
119 medical studies largely only examined a limited selection of diseases directly associated with  
120 reproductive biology such as recurrent miscarriage<sup>26</sup>, polycystic ovary syndrome<sup>27</sup>, and  
121 endometriosis<sup>28</sup>. Another large area of research has been the study of infertility and  
122 inflammatory bowel disease (IBD). A systematic review found that up to one-third of IBD  
123 patients opted to be voluntarily childless, often related to lack of knowledge related to  
124 pregnancy-related IBD issues<sup>29</sup>, with clinical studies finding that women with moderate to  
125 severe IBD had higher incidences of adverse pregnancy outcomes<sup>30</sup>. Multiple sclerosis has  
126 also been associated with higher levels of childlessness, linked to fewer being in a stable  
127 relationship, fear of genetically transmitting multiple sclerosis, or discontinuation of  
128 treatments<sup>31</sup>. Another line of study has examined fecundity in patients with major psychiatric  
129 disorders<sup>32</sup>, and those with a genetic liability for schizophrenia, with the later finding no clear  
130 association with childlessness<sup>33</sup>.

131 Current research has examined singular diseases in parallel and thus lacks a systematic  
132 assessment of the role of multiple diseases on childlessness and their relative importance.  
133 Moreover, the association of diseases can be sex-specific, given that men and women differ  
134 regarding both reproductive patterns (men have a higher chance of being childless, higher  
135 parity, and a longer reproductive lifespan than women<sup>34</sup>) and the prevalence and severity of  
136 diseases. For men, comparatively limited information has been collected on the causes and  
137 consequences of infertility and having children<sup>35,36</sup>, despite infertility being a major public  
138 health concern. Finally, previous studies have had a limited time horizon to follow  
139 participants and the methodological tools to control for unmeasured familial confounding,  
140 either genetic or environmental.

141 We address these limitations of previous research by studying the entire reproductive and  
142 health history of a cohort of Finnish and Swedish men and women until the end of their  
143 reproductive period using high-quality nationwide population registers. The current study  
144 determines to what extent diseases are associated with childlessness, whether such  
145 associations vary between sexes, differ by the age at disease onset, or stratify by parity, and

146 the role that partnership formation and educational level plays in mediating the results. To  
 147 answer these questions, we used a disease-agnostic family-based approach which allows us to  
 148 robustly evaluate the relative importance of 414 disease diagnoses in relation to childlessness  
 149 while providing public-health-relevant metrics to interpret the relative importance and  
 150 contextualize the results of our study.  
 151

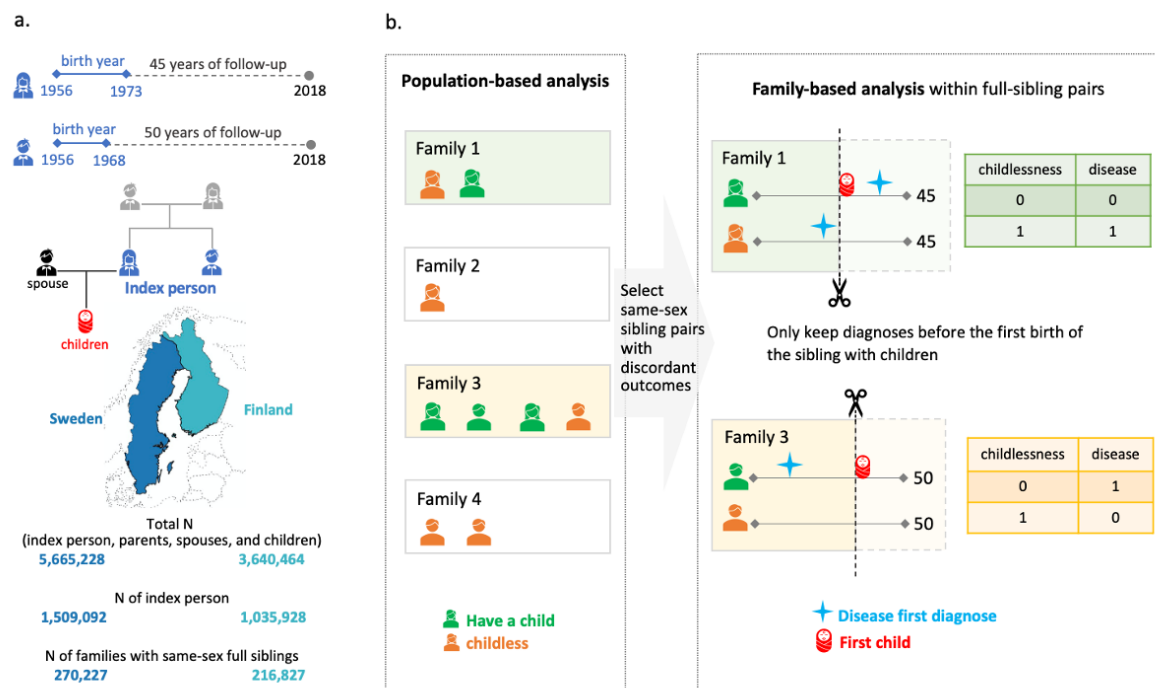

152  
 153 **Fig. 1: Schematic overview of the study**

154 Panel A shows the birth cohorts, the follow-up period, and the number of Finns and Swedes  
 155 included in the analyses. A total of three generations of familial relationships were considered  
 156 for the index persons, with the parental information used to match sibling pairs, the children's  
 157 information to define the main outcome of childlessness, and the registered spouse's  
 158 information to determine the secondary outcome of singlehood. Panel B shows the statistical  
 159 approach used in the main analyses, where only families with same-sex siblings discordant  
 160 for childlessness are included. Within each family, we randomly selected one childless  
 161 sibling as a case, and, as control, the sibling with children that was the closest for birth order  
 162 with the case. Within a sibling pair, disease diagnoses are only considered if they occurred at  
 163 least one year before the birth of the first child or within the corresponding age at which the  
 164 sibling was childless, since sibling ages will differ.

165

## 166 **Results**

### 167 **Study population**

168 Our study population included 1,425,640 women and 1,119,380 men, born after 1956 and  
169 alive by age 16, did not emigrate, and largely completed their reproductive period at the end  
170 of 2018 (**Fig. 1A**). Among them, 230,198 women and 279,454 men were childless. The  
171 proportion of childless individuals – those with no live-born children – was higher in men  
172 (25.4%) than women (16.6%), higher amongst Finns (23.3%) than Swedes (18.7%), and  
173 slightly higher in the general population than in individuals who had same-sex full-siblings  
174 (0.9% and 0.5% higher in women and men, respectively). Among individual with children, a  
175 two-child parity was most prevalent in men (47.1%) and women (48.9%), amongst both  
176 Finns (44.0%) and Swedes (50.8%) (**Table S2**). Both women and men with the lowest  
177 educational attainment were more likely to be childless (e.g., in Finland, 24.2% were  
178 childless in women and 37.4% in men) than the general population (e.g., in Finland, 18.8%  
179 were childless in women and 27.7% in men) (**Table S3-S4**). When looking across  
180 generations, the education level of parents was correlated with an individual's childless status  
181 (**Table S3-S4**). For example, among index persons whose parents had completed the first  
182 stage of tertiary education, men were less likely to be childless (e.g., in Finland, 25.3%)  
183 compared to the general population (e.g., in Finland, 27.7%) while women behaved in the  
184 opposite way (e.g., in Finland, 21.3%, compared to 18.8% in the general population).

185 For the entire study population, we have information from nationwide registers covering 414  
186 disease diagnoses across 16 main categories (**Figure S2; Table S5**). Disease prevalence  
187 across the entire follow-up was highly comparable between Finland and Sweden (**Figure S3**)  
188 and we presented meta-analysis results between the two countries. Our main analysis focused  
189 on 71,524 full-sister and 77,622 full-brother pairs who were discordant on childlessness (**Fig.**  
190 **1B**).

191

### 192 **Disease diagnoses associated with childlessness**

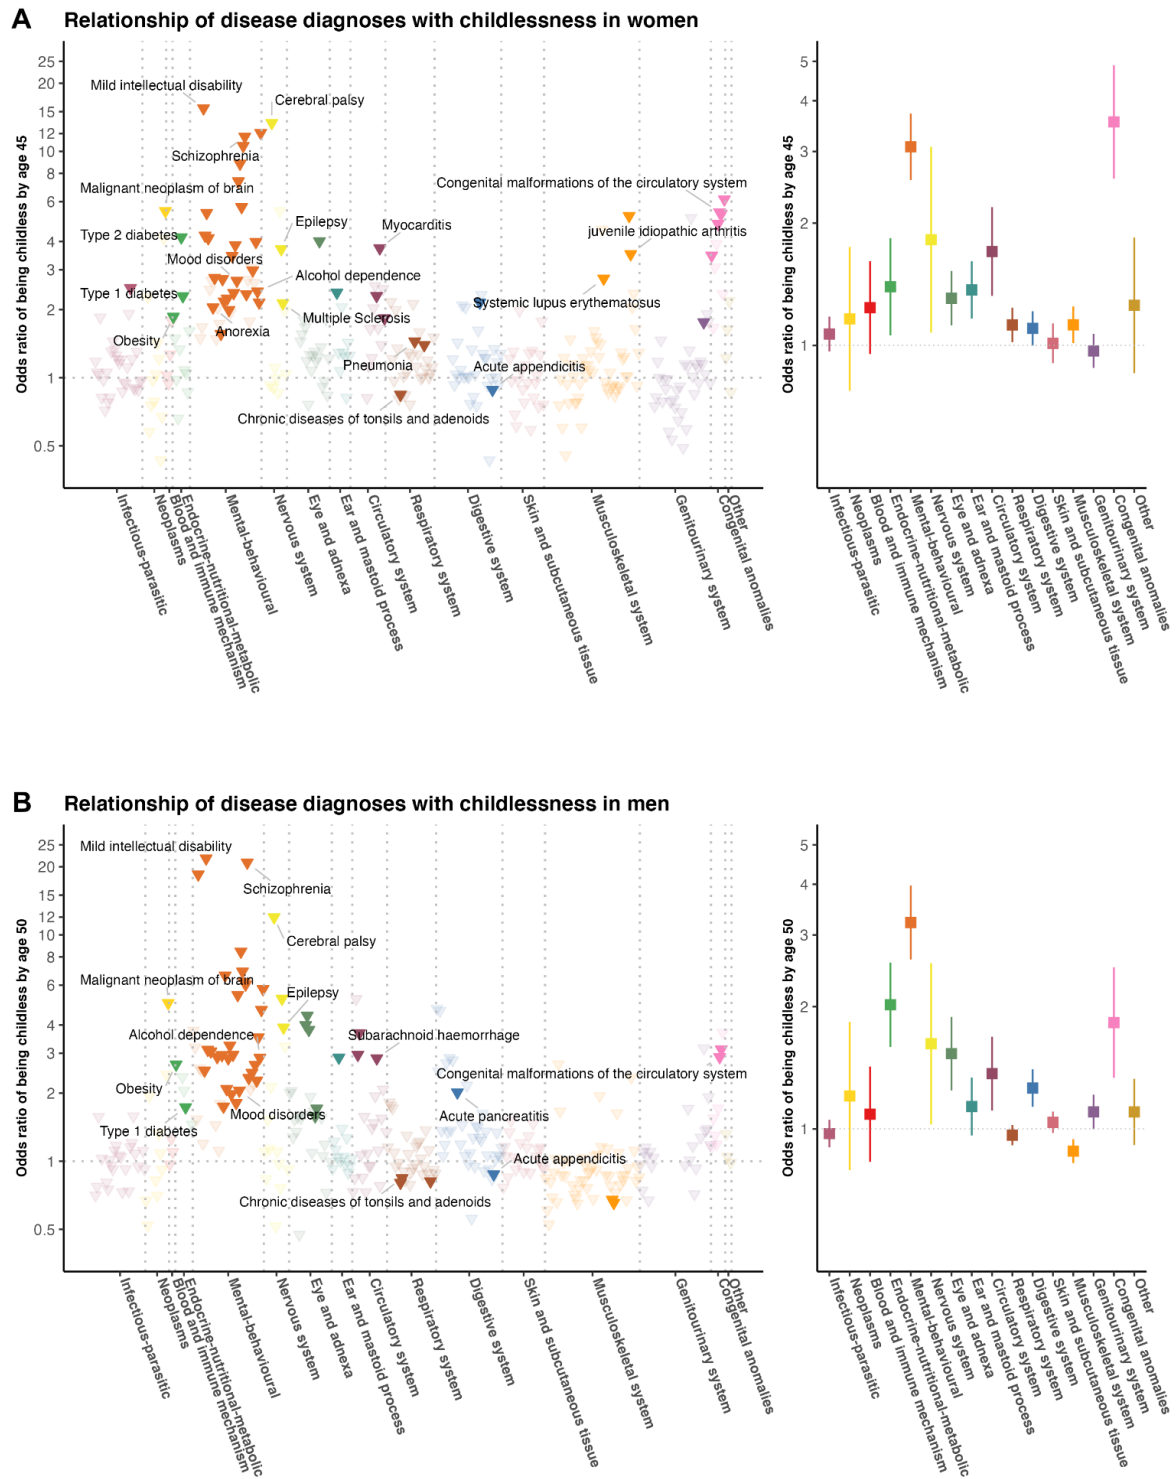

193

194 **Fig. 2: Relationship of 403 disease diagnoses with childlessness by age 45 in women**  
 195 **(panel A) and 50 in men (panel B) in 71,524 full-sister and 77,622 full-brother pairs who**  
 196 **were discordant on childlessness, using a matched case-control design**



197 Odds ratios are computed for each disease diagnosis (left figures of each panel) and averaged  
198 over disease categories (right figures of each panel). Only disease diagnoses that are  
199 significantly associated with childlessness after multiple-testing correction ( $P < 1.5 \times 10^{-4}$ ) are  
200 colored. Labels are assigned only for certain disease diagnoses that are described in the text.

201

202 Eleven rare diseases were associated with an almost complete lack of children (e.g., severe  
203 intellectual disability, childhood leukemia, and muscular dystrophy) (**Table S6**) and were  
204 therefore not included in all the remaining analyses. Out of the remaining 403 diseases (328  
205 in women; 325 in men), 74 were significantly associated with childlessness in at least one sex  
206 ( $P < 1.5 \times 10^{-4}$ , after multiple-testing correction), with 33 disease diagnoses shared among  
207 women and men (**Fig. 2**). A full list of the results can be found in **Table S7** or in an  
208 interactive dashboard: <https://dsgelrs.shinyapps.io/DiseaseSpecificLRS/>. More than half of  
209 the significant associations were mental-behavioral disorders (26/53 (49%) in women and  
210 30/54 (55.5%) in men), which was, together with congenital anomalies, the disease categories  
211 with the strongest associations with childlessness (OR=3.1 [95% CI: 2.6-3.7] in women  
212 compared to men (OR=3.2 [CI: 2.6-4.0]), averaging over all mental-behavioral disorders  
213 (**Fig. 2** and **Table S8**). There was substantial heterogeneity among different mental-  
214 behavioral disorders ( $P = 4.5 \times 10^{-71}$  in women and  $7.9 \times 10^{-128}$  in men in a heterogeneity test).  
215 For example, mild intellectual disability was the condition with the strongest association with  
216 childlessness (e.g., OR=21.7 [10.8-43.5] in men), while smaller effects were observed for  
217 mood disorders (e.g., 2.1 [1.8-2.3] in men). Severe diseases of the brain such as cerebral  
218 palsy (OR=13.4 [7.9-22.7] in women and 12.0 [6.5-22.2] in men) and malignant neoplasm of  
219 the brain (5.5 [2.8-10.8] in women and 5.0 [2.8-8.9] in men), which impair health and  
220 functioning in several ways but can also result in behavioral and personality disorders<sup>37,38</sup>,  
221 were also strongly associated with childlessness. For individuals with severe mental disorders  
222 or physical disabilities (e.g., intellectual disability), especially amongst women, involuntary  
223 sterilization was historically carried out in Finland (from 1935 to 1970) and Sweden (1934 to  
224 1976)<sup>39</sup>.

225 Another disease category strongly associated with childlessness, in both sexes, encompassed  
226 the endocrine-nutritional-metabolic disorders (OR=1.4 [1.1-1.8] in women and 2.0 [1.6-2.6]  
227 in men, averaging over all endocrine-nutritional-metabolic disorders). For example, a  
228 diagnosis of obesity (OR=1.8 [1.5-2.4] in women and OR=2.7 [2.0-3.6] in men), which is  
229 normally recorded in the secondary healthcare registers only in severe cases, and type 1 and

230 type 2 diabetes (e.g., in women, OR=2.3 [2.0-2.6] for type 1 diabetes and 4.2 [2.2-8.1] for  
231 type 2 diabetes) were among the diseases with the strongest associations with childlessness.

232 We found several inflammatory diseases to be significantly associated with childlessness  
233 across multiple organ systems including respiratory, circulatory, genitourinary, digestive,  
234 nervous, and musculoskeletal systems. For example, a diagnosis of pneumonia (OR=1.4 [1.3-  
235 1.6]), myocarditis (3.7 [2.3-6.1]), chronic tubulo-interstitial nephritis (1.8 [1.3-2.3]), multiple  
236 sclerosis (2.1 [1.5-3.1]), systemic lupus erythematosus (2.7 [1.6-4.6]), and juvenile idiopathic  
237 arthritis (3.5 [2.6-4.9]) significantly increased subsequent childlessness in women.

238 Puzzlingly, but consistently with previous findings<sup>40</sup>, we observed that chronic diseases of  
239 tonsils and adenoids and acute appendicitis, were associated with reduced, rather than an  
240 increased odds of childlessness for women and men (e.g., for chronic diseases of tonsils and  
241 adenoids, OR=0.84 [0.80-0.88] in women and 0.84 [0.80-0.89] in men), with similar effect  
242 sizes in Finns and Swedes (P for heterogeneity=0.60 between two countries in both sexes).

243

#### 244 **Sex-specific effects**

245 The disease category encompassing congenital anomalies showed markedly different effects  
246 between sexes (OR=3.5 [95% CI: 2.6-4.9] in women and men [OR=1.8 [1.3-2.5], P for sex  
247 difference= $3.7 \times 10^{-3}$ ). Overall, malformations of the digestive system (4.8 [2.2-10.3] in  
248 women and 1.7 [1.0-3.0] in men, P=0.03) and musculoskeletal system (3.5 [2.0-6.1] in  
249 women and 1.2 [0.7-1.9] in men, P= $3.7 \times 10^{-3}$ ) were more strongly associated with  
250 childlessness in women than men.

251 Significant sex-dependent effects were also observed for several mental-behavioral and  
252 endocrine-nutritional-metabolic disorders (**Fig. 3A**). For example, diagnoses of schizophrenia  
253 (OR=11.6 [9.1-14.9] in women and 20.8 [16.1-27.0] in men, P for sex difference= $1.5 \times 10^{-3}$ )  
254 and acute alcohol intoxication (2.2 [1.6-2.9] in women and 4.7 [3.8-5.7] in men, P= $4.0 \times 10^{-5}$ )  
255 had stronger associations with childlessness in men compared to women. Diagnosis of type 1  
256 diabetes showed stronger association in women than in men (2.3 [2.0-2.6] in women and 1.7  
257 [1.5-2.0] in men, P= $3.9 \times 10^{-3}$ ). The stronger association in women might be due to the fact  
258 that, in the observational period, women with type 1 diabetes were recommended against  
259 pregnancies if under poor glycemic control<sup>41</sup>.

260

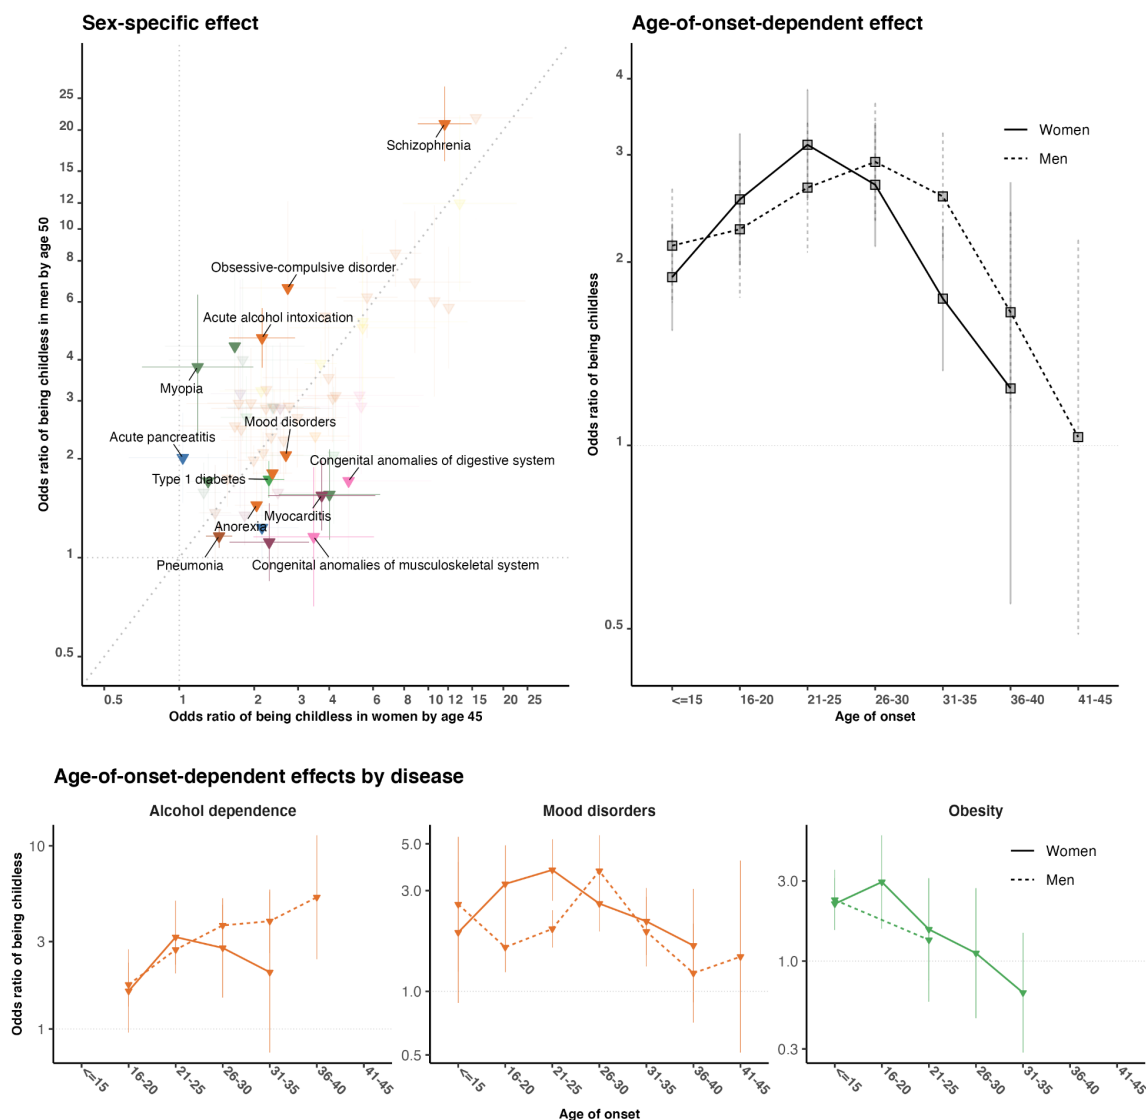

261  
 262 **Fig. 3: Sex-specific (panel A) and age-of-onset-dependent effects (panel B and C) for the**  
 263 **association between disease diagnoses and childlessness in 71,524 full-sister and 77,622**  
 264 **full-brother pairs who were discordant on childlessness**

265 In panel A, we compare the odds ratio for 60 disease diagnoses that significantly increased  
 266 the odds of childlessness either in men or women. Only disease diagnoses that are  
 267 significantly different between sexes at a nominal P value are colored. In Panel B we report,  
 268 for each age category, the average effect associated with childlessness across 30 disease  
 269 diagnoses in women and 31 in men as obtained from an age-of-onset-stratified analysis. In  
 270 Panel C, we report age-of-onset-stratified odds ratios associated with childlessness for three  
 271 major diseases/disorders for which we observe a significant trend. Estimates for each age

272 category are computed only if the number of individuals with this disease within the age  
273 group is more than five.

274

### 275 **Age-of-onset of disease effects**

276 We hypothesized that the age when the disease was first diagnosed, a proxy for the age of  
277 onset, would influence the chances of being childless by either capturing disease severity or  
278 directly impacting factors underlying individuals' reproductive trajectory. We first evaluated  
279 if there was a general trend across disease diagnoses (30 in women and 31 in men) that were  
280 associated with childlessness and for which we had enough individuals to estimate age-of-  
281 onset-stratified effects (**Fig. 3B** and **Table S9-S10**). We observed a non-linear effect, with the  
282 strongest association with childlessness occurring when the disease was first diagnosed  
283 between 21-25 years old in women (OR=3.1 [2.5-3.8]) and later, between 26-30 years old, in  
284 men (3.1 [2.4-3.9]). Smaller effects were observed at younger ages (e.g., in women, OR=1.9  
285 [1.6-2.3] for onset before 16 years old,  $P=7.1 \times 10^{-4}$ ) and, especially, older ages of onset (e.g.,  
286 in women, 1.2 [0.5-2.8] for onset between 36-40 years old,  $P=0.04$ ). Despite this broader  
287 trend, there was substantial heterogeneity between disease diagnoses (**Fig. 3C**). For example,  
288 among women diagnosed with obesity, the group that received their first diagnoses between  
289 16-20 years old had higher levels of childlessness than those diagnosed at later ages (OR=3.0  
290 [1.6-5.6] for diagnosed between 16-20 years old and 1.1 [0.5-2.7] between 26-30 years old,  $P$   
291 differences=0.08).

292

### 293 **Stratification by parity for individuals with children**

294 In the main analyses we compared childless individuals to their siblings with children,  
295 regardless of parity. We reasoned that childless siblings might be more phenotypically similar  
296 to their siblings with fewer children (lower parity) compared to siblings who had multiple  
297 children (higher parity). When comparing childless individuals to their siblings with just one  
298 child, 14 disease diagnoses in women and six in men had significantly reduced ORs (**Figure**  
299 **S4A-B**) compared to the main analysis. For example, in women, the OR of schizophrenia on  
300 childlessness dropped from 11.6 [9.1-14.9] to 5.1 [3.7-7.0] ( $P$  difference= $6.9 \times 10^{-5}$ ) when we  
301 compared childless individuals with their siblings with just one child. For individuals with  
302 higher parities, such as having exactly two children (**Figure SC-D**) or those with at least  
303 three or more children (**Figure S4E-F**), limited differences in ORs were observed compared

304 to the main analyses. Jointly, these results indicated that childless individuals were more  
305 similar to their siblings with one child with regard to risk for childlessness-associated early-  
306 life diseases compared to siblings with higher parities.

307

### 308 **Number of unborn children and completed fertility rate reduction related to disease** 309 **diagnoses**

310 Having identified a set of disease diagnoses that conferred a larger relative odds of  
311 childlessness, we estimated the number of ‘missing children’ not born in the observational  
312 period due to the disease diagnoses by combining relative risk, disease prevalence, and parity.  
313 We estimated that 2,728 [2,586-2,871] children per 100,000 men and 1,489 [1,376-1,605] per  
314 100,000 women were missing or not born due to their parents having at least one mental-  
315 behavioral disorder (**Table S13-S14**). Accordingly, this disease category was associated with  
316 68% of total unborn children related to disease diagnoses among males and 59% among  
317 female participants. Disease-specific analyses revealed that schizophrenia was linked to the  
318 largest number of children that were not born between both sexes (893 [848-930] children per  
319 100,000 men, 612 [549-669] per 100,000 women) followed by anxiety disorders among men  
320 (569 [475-665]) and mood disorders among women (389 [313-470]). We note that the  
321 estimates of the number of children not born or ‘missing’ due to disease diagnoses could be  
322 slightly biased because of the use of only individuals with same-sex full siblings in our main  
323 analyses.

324 The completed total fertility rate (TFR), partitioned as the sum of disease and non-disease  
325 age-specific fertility rates for each sex, was markedly lower among individuals who carry any  
326 of the disease diagnoses significantly associated with childlessness (TFR=1.5 for women and  
327 1.1 for men) compared to the unaffected individuals (2.0 for women and 1.8 for men),  
328 resulting in an overall TFR reduction of 38% in women and 21% in men (**Table S15-S16**).  
329 Overall, affected women and men accounted for 5.4% and 4.6% of overall observed  
330 population-level TFR, respectively.

331

### 332 **Mediation effect by singlehood**

333 There were 83.0% women and 77.0% men having registered partners before age 45 and 50,  
334 respectively. Restricting to childless individuals, the proportion dropped to 36.3% in women  
335 and 29.4% in men. We therefore examined to what degree the associations between disease

336 diagnoses and childlessness were mediated by singlehood. First, we estimated the effect of  
337 disease diagnoses on the chance of being without a partner by age 45 in women and 50 in  
338 men (**Figure S5-S6**). We then compared log ORs on singlehood with log ORs on  
339 childlessness and observed a high correlation between these two estimates in both women  
340 ( $R^2=0.71$ ,  $P=1.0\times 10^{-15}$ ) and men ( $R^2=0.85$ ,  $P=3.5\times 10^{-23}$ ) (**Figure S7**). A causal mediation  
341 analysis performed for each disease also indicated the mediation role of partnership  
342 formation, with 29.3% (median) of the disease effects on childlessness in women and 37.9%  
343 in men mediated by singlehood (**Table S17**). Different patterns were observed across  
344 diseases. For example, singlehood was a significant mediator for women diagnosed with  
345 schizophrenia (OR=2.1 [2.0-2.2] for indirect and 6.8 [5.0-9.2] for direct effect) but not for  
346 women with hypertension (1.2 [1.1-1.4] for indirect and 2.4 [1.6-3.5] for direct effect).

347 Next, we investigated if some of the associations between disease diagnoses and  
348 childlessness remained significant among partnered individuals. We considered 133 disease  
349 diagnoses in women and 123 in men, which had more than 30 affected individuals with  
350 registered partners in the sibling-based analysis. Some diseases that were strongly associated  
351 with singlehood (e.g., mild intellectual disability) could not be included in the analyses  
352 because they were too rare among partnered individuals. Nonetheless, we observed six  
353 diseases in women and eleven in men that remained associated with childlessness among  
354 partnered individuals (**Figure S8**). Compared to the estimates obtained from both partnered  
355 and unpartnered individuals, the effects on childlessness were largely reduced for most  
356 disease diagnoses (**Figure S9**), such as epilepsy (e.g., from OR=3.7 [3.2-4.3] for all women  
357 to 1.8 [1.4-2.4] for partnered women) and acute alcohol intoxication in men (from 4.7 [3.8-  
358 5.7] for all men to 2.4 [1.5-3.8] for partnered men). Several endocrine-nutritional-metabolic  
359 diseases retained a strong association with childlessness among partnered individuals, such as  
360 obesity in men (OR=2.7 [2.0-3.6] for all men and 3.3 [1.9-5.7] for partnered men) and type 1  
361 diabetes in women (2.3 [2.0-2.6] for all women and 2.5 [2.0-3.2] for partnered women).

362

### 363 **Population-based and sensitivity analyses**

364 We performed several sensitivity analyses to determine the robustness of our estimation.  
365 First, our main results were based on within-sibling analysis, which can account for  
366 unmeasured familial factors but also made several assumptions, including siblings being  
367 generalizable to the population. Thus, we also obtained population-based estimates from a

368 matched case-control design controlling for several potential confounders (**Figure S10**).  
369 Overall, the population-based design resulted in larger sample sizes, similar ORs, and smaller  
370 CIs compared to the sibling-based design (**Figure S11**). However, stronger associations were  
371 observed from the population-based design in men for psychoactive substance abuse (e.g., for  
372 alcohol dependence, OR=2.9 [2.5-3.2] from sibling-based design and 3.8 [3.5-4.0] from  
373 population-based design, P differences= $1.4 \times 10^{-4}$ ) and mood disorders (2.1 [1.8-2.3] from  
374 sibling-based design and 2.7 [2.5-2.9] from population-based design, P= $2.0 \times 10^{-4}$ ).

375 Second, in the main analysis, we included individuals who died before the end of follow-up  
376 (affecting 7.4% full-sisters and 15.0% full-brothers) thus including reproductive-age  
377 mortality as one of the possible mechanisms explaining childlessness. To understand the  
378 overall effect of reproductive-age mortality, we also conducted an analysis only considering  
379 individuals alive by the end of follow-up (**Figure S12**). Overall, the results were consistent  
380 (**Figure S13**), but we observed two disease diagnoses in men for which the main effects on  
381 childlessness were partially explained by reproductive age mortality: acute alcohol  
382 intoxication (OR=4.7 [3.8-5.8] for all men and 3.9 [2.2-3.8] for men alive by age 50, P  
383 differences=0.006) and subarachnoid hemorrhage (2.9 [1.8-4.5] for all men and 0.9 [0.4-1.8]  
384 for men alive by age 50, P=0.005). Third, in the main analysis, we opted for conditional  
385 logistic regression because the length of follow-up would be identical to the sibling pairs if  
386 ignoring reproductive-age mortality (**Fig. 1 and 2**). When using a Cox proportional hazards  
387 model that captured both time-varying and death (**Figure S14**), we observed similar results  
388 with reductions in some disease diagnoses (**Figure S15**).

389 Fourth, research has found that individuals who remain childless in Finland, particularly men,  
390 have lower levels of education, suggesting it may be important to adjust for educational  
391 level<sup>1,42</sup>. In the sibling-based analysis, we adjusted for differences in individuals' education  
392 level between siblings but did not find substantial differences in our results compared to the  
393 unadjusted main analysis (**Figure S16**). In the population-based analysis, we adjusted for the  
394 individuals' highest education level in the population-based analysis and observed significant  
395 changes in ORs for many diseases, in both women and men (**Figure S17**). For example, in  
396 men, after adjusting for the highest education level, many disease diagnoses had significantly  
397 reduced ORs (16 out of 45 (35.5%) disease diagnoses with increased risk of childlessness),  
398 while obesity (OR increased from 3.2 [2.8-3.7] to 4.4 [3.7-5.2], P differences= $3.5 \times 10^{-3}$ ) and  
399 acute pancreatitis (OR increased from 1.9 [1.6-2.3] to 2.5 [2.1-3.0], P differences=0.04) were  
400 the only disease diagnoses exhibiting stronger associations.

401

## 402 **Discussion**

403 The rich longitudinal Finnish and Swedish nationwide population registers provided a unique  
404 resource to comprehensively assess the role and relative importance of multiple diseases on  
405 childlessness. In addition to the results summarized here, all findings can be explored on the  
406 interactive online dashboard available: <https://dsgelrs.shinyapps.io/DiseaseSpecificLRS/>.

407 Our study uses a hypothesis-free approach to estimate the associations between early-life  
408 diseases and childlessness across the entire reproductive lifespan. Importantly, we identified  
409 several novel disease-childlessness associations such as autoimmune (e.g., juvenile idiopathic  
410 arthritis, multiple sclerosis, systemic lupus erythematosus) and inflammatory diseases (e.g.,  
411 myocarditis). For certain diseases, treatments such as methotrexate (immunosuppressant,  
412 widely used for rheumatoid arthritis and multiple sclerosis, and occasionally used for  
413 systemic lupus erythematosus) were reported to have side effects on fertility in women<sup>43</sup>.

414 Amongst all disease categories, mental-behavioral disorders had the strongest associations  
415 with childlessness and were associated with 68% of the total ‘missing’ or unborn children  
416 among males and 59% among females attributable to these diseases. Previous literature has  
417 given much attention to the role that diseases play in childlessness among women, while men  
418 have been understudied<sup>44</sup>. We observed substantial sex differences for disease-childlessness  
419 associations. For example, mental-behavioral disorders such as schizophrenia and acute  
420 alcohol intoxication had stronger associations with childlessness in men than women, while  
421 diabetes-related diseases and congenital anomalies had stronger associations amongst  
422 women. These sex-specific effects may potentially be explained by differences in disease  
423 severity, bias in diagnostic practices, partner choices, and direct biological effects on fertility.  
424 Sex differences were also observed in the impact that age-of-onset of disease has on  
425 childlessness. Overall, diseases diagnosed between 21-25 years old in women and, later,  
426 between 26-30 years old in men, tend to have the strongest association with childlessness.  
427 This is also consistent with the sex difference in age at union formation, which occurs later in  
428 men<sup>45</sup>.

429 Our analyses highlight the important effects that many diseases have on partnership  
430 formation. Childless individuals are twice as likely to be single, in line with previous research  
431 showing the importance of selection into partnership on fertility<sup>23</sup>. Singlehood represents a  
432 major mediator for the odds of being childless, especially in men, and we estimated that



433 29.3% (median) of the disease effect on childlessness in women and 37.9% in men was  
434 mediated by partnership formation. The effects of disease diagnoses on partnership formation  
435 are mediated by complex socio-cultural factors, social norms, and sex-specific behavioral  
436 preferences. For example, mental-behavioral disorders such as schizophrenia and acute  
437 alcohol intoxication were strongly associated with singlehood in men, but the effects were  
438 substantially smaller in women likely reflecting how different social and individual  
439 preferences for behavioral phenotypes correlated to mental-behavioral disorders impact  
440 partner choice in the two sexes. Nonetheless, we also identify several diseases that impact  
441 childlessness among partnered individuals. Some of these diseases are more likely to exert a  
442 direct biological effect on fertility or pregnancy complications as in the case of diabetes and  
443 obesity, whereas others such as some mental-health disorders, might impact family stability  
444 or delay the age at family formation.

445 Our study has several strengths. First, for the majority of the study participants, we have  
446 virtually complete coverage of health and reproductive information until the end of their  
447 reproductive period. This allows us to estimate public-health-relevant metrics such as the  
448 total number of unborn or ‘missing’ children related to diseases, which cannot be estimated  
449 with incomplete follow-up.

450 Second, we considered more than 400 diseases across both men and women, allowing us to  
451 compare relative effects on childlessness both between diseases and between sexes. The use  
452 of nationwide data from two countries provided a large sample of 2.5 million, and most  
453 importantly, allowed us to assess how robust our findings were in different healthcare  
454 systems and diagnostic practices. Finland has had a marked increase in childlessness since the  
455 1970s of up to 22% for women and 32% for men<sup>9,10</sup>, with our analyses revealing potential  
456 underlying mechanisms such as the wider detrimental effects of alcohol dependence in men  
457 and endocrine-nutritional-metabolic disorders.

458 Third, by leveraging the information about family formation and singlehood, we could  
459 explore to what extent this information, which has been described as an important mediator  
460 of childlessness<sup>46</sup>, mediated the association between disease and childlessness. Fourth, we  
461 used a matched-sibling design to limit confounding from a shared familial environment. In  
462 our study, individuals with siblings had only a slightly lower proportion of childlessness  
463 compared to the general population. Sibling designs have been extensively used in analyses  
464 of Nordic registers and have several advantages compared to population-based estimates<sup>47,48</sup>.

465 Our study also reveals the legacy of a troubled and unjust past of reproductive rights, often  
466 stemming from eugenic thinking and discrimination related disability and gender<sup>38,49,50</sup>. We  
467 found that intellectual disability was the condition with the strongest association in men, but  
468 also high levels of childlessness associated with cerebral palsy and behavioural and  
469 personality disorders. Until 1970 in Finland and up to 1976 in Sweden, individuals  
470 categorized as having severe mental disorders or physical disabilities – particularly women –  
471 were subjected to involuntary sterilization<sup>38</sup>. We also acknowledge that women with existing  
472 diseases, such as women with heart disease, can experience serious complications from  
473 pregnancy, thereby noting that strategies for high-risk individuals need further  
474 development<sup>51</sup>.

475 Our study also has several limitations. First, disease diagnoses are largely obtained from  
476 registers covering secondary and tertiary healthcare in hospitals that capture more severe  
477 disease cases (e.g., mental health and behavioral conditions), and thus, lack of the onset and  
478 occurrence of major diseases included in primary healthcare data (e.g., low-grade metabolic  
479 conditions). Moreover, disease diagnoses have changed over time; we have defined disease  
480 outcomes by harmonizing three versions of International Classification of Diseases (ICD)  
481 codes that might capture diseases with different accuracy. Our findings are based on  
482 individuals born between 1956 and 1973 and results may thus not be entirely generalizable to  
483 more recent cohorts, because reproductive and partnering practices have changed and because  
484 better treatments might alleviate the effect of some diseases on childlessness.

485 Second, as with previous studies to date, we were unable to partition the impacts that diseases  
486 have into voluntary and involuntary childlessness due to a lack of data on reproductive  
487 preferences and intentions and difficulties in differentiating the two<sup>22,52,53</sup>. Given that  
488 estimates of the voluntary childfree group are around a quarter of total childless, we note that  
489 public health interventions should take this group of voluntary childfree individuals into  
490 account. Among factors that impact involuntary childlessness, the effect of long-term  
491 institutionalization and disease-related treatments are two aspects that future registry-based  
492 studies might be able to explore. For example, medications for epilepsy are known to be  
493 associated with pregnancy complications<sup>54</sup>.

494 Third, assortative mating may lead to an overestimation of the disease impact of childlessness  
495 among partnered couples.

496 Fourth, despite our attempt to use a study design that minimizes confounding and reverse  
497 causality, these biases might challenge the interpretation of the results. For example, although  
498 full siblings share roughly half of their genetic materials and similar family of origin  
499 characteristics and only siblings with the closest birth order were considered, siblings can still  
500 experience different childhood conditions and even be influenced by each other's  
501 conditions<sup>55</sup>. Also, the use of only individuals with same-sex full siblings may introduce  
502 selection bias, although for most disease diagnoses their effects obtained from sibling-based  
503 analyses were not significantly different from those obtained from population-based analyses.  
504 Finally, there is the question of the generalisability of our results to other nations. The Nordic  
505 countries have been the forerunners of demographic change in the realm of partnerships and  
506 fertility<sup>56,57</sup>, making these results relevant for other industrialised nations. There are also  
507 important socioeconomic fertility gradients in Sweden and Finland that mirror changes in  
508 many industrialised nations. In the Nordic countries, there has been a positive association  
509 between men's higher education and fertility<sup>58,59</sup>. For Nordic women, there was initially the  
510 reverse gradient (i.e., higher levels of childlessness amongst those with higher education), but  
511 this has shifted over time with women increasingly similar to men<sup>58</sup>. This 'new Nordic'  
512 fertility regime links higher socioeconomic status to higher fertility<sup>60</sup> but also multi-partner  
513 fertility<sup>61</sup>, a trend that has emerged in other nations as well.

514 In conclusion, we comprehensively described the effects different diseases, particularly those  
515 with onset prior to the peak reproductive age have on the chance of being childless over a  
516 lifetime. This evidence can be used as a basis for future studies focusing on prioritizing health  
517 interventions to counter involuntary childlessness.

518

## 519 **References**

- 520 1. Kreyenfeld, M. and Konietzka, D., 2017. Analyzing childlessness (pp. 3-15). Springer  
521 International Publishing.
- 522 2. Tanturri, M.L. and Mencarini, L., 2008. Childless or childfree? Paths to voluntary  
523 childlessness in Italy. *Population and development review*, 34(1), pp.51-77.
- 524 3. Miettinen, A. and Szalma, I., 2014. Childlessness intentions and ideals in Europe. *Finnish*  
525 *Yearbook of Population Research*, 49, pp.31-55.

- 526 4. Dykstra, P.A. and Hagestad, G.O., 2007. Roads less taken: Developing a nuanced view of  
527 older adults without children. *Journal of family issues*, 28(10), pp.1275-1310.
- 528 5. Wang, Y., Fu, Y., Ghazi, P., Gao, Q., Tian, T., Kong, F., Zhan, S., Liu, C., Bloom, D.E.  
529 and Qiao, J., 2022. Prevalence of intimate partner violence against infertile women in low-  
530 income and middle-income countries: a systematic review and meta-analysis. *The Lancet*  
531 *Global Health*, 10(6), pp.e820-e830.
- 532 6. Last, J.V., 2013. What to expect when no one's expecting: America's coming demographic  
533 disaster. Encounter Books.
- 534 7. Sobotka T. Childlessness in Europe: Reconstructing long-term trends among women born  
535 in 1900–1972. In: Kreyenfeld M, Konietzka D, eds. *Childlessness in Europe: Contexts,*  
536 *causes, and consequences*. Cham: Springer, 2017: 17-53.
- 537 8. Sobotka, T., 2021. World's highest childlessness levels in East Asia. *Population Societies*,  
538 595(11), pp.1-4.
- 539 9. Rotkirch A, Miettinen A. Childlessness in Finland. In: Kreyenfeld M, Konietzka D, eds.  
540 *Childlessness in Europe: Contexts, causes, and consequences*. Cham: Springer, 2017: 139-  
541 158.
- 542 10. Saarela J, Skirbekk V. Childlessness and union histories: evidence from Finnish  
543 population register data. *J Biosoc Sci* 2020; **52**: 78-96.
- 544 11. Balbo N, Billari FC, Mills MC. Fertility in advanced societies: A review of research. *Eur*  
545 *J Popul* 2013; **29**: 1-38.
- 546 12. Mills M, Rindfuss RR, McDonald P, Te Velde E. Why do people postpone parenthood?  
547 Reasons and social policy incentives. *Hum Reprod Update* 2011; **17**: 848-860.
- 548 13. Esping-Andersen, G., 2009. Incomplete revolution: Adapting welfare states to women's  
549 new roles. Polity.
- 550 14. Thévenon, O., 2009. Increased women's labour force participation in Europe: Progress in  
551 the work-life balance or polarization of behaviours?. *Population*, 64(2), pp.235-272.
- 552 15. Begall, K. and Mills, M., 2011. The impact of subjective work control, job strain and  
553 work–family conflict on fertility intentions: A European comparison. *European journal of*  
554 *population= Revue europeenne de demographie*, 27(4), p.433.

- 555 16. Mills, M. and Blossfeld, H.P., 2006. Globalization, Uncertainty and the Early Life  
556 Course: A Theoretical Framework1. In Globalization, uncertainty and youth in society (pp.  
557 1-23). Routledge.
- 558 17. Hofmann, B. and Hohmeyer, K., 2013. Perceived economic uncertainty and fertility:  
559 Evidence from a labor market reform. *Journal of Marriage and Family*, 75(2), pp.503-521.
- 560 18. Te Velde, E., Habbema, D., Leridon, H. and Eijkemans, M., 2012. The effect of  
561 postponement of first motherhood on permanent involuntary childlessness and total  
562 fertility rate in six European countries since the 1970s. *Human reproduction*, 27(4),  
563 pp.1179-1183.
- 564 19. Merz, E.M. and Liefbroer, A.C., 2012. The attitude toward voluntary childlessness in  
565 Europe: Cultural and institutional explanations. *Journal of Marriage and Family*, 74(3),  
566 pp.587-600.
- 567 20. Berrington, A., 2004. Perpetual postponers? Women's, men's and couple's fertility  
568 intentions and subsequent fertility behaviour. *Population trends*, 117, pp.9-19.
- 569 21. Gray, E., Evans, A. and Reimondos, A., 2013. Childbearing desires of childless men and  
570 women: When are goals adjusted?. *Advances in life course research*, 18(2), pp.141-149.
- 571 22. Stephansson O, Dickman PW, Johansson AL, Cnattingius S. The influence of  
572 socioeconomic status on stillbirth risk in Sweden. *Int J Epidemiol* 2001; **30**: 1296-1301.
- 573 23. Briley DA, Tropf FC, Mills MC. What explains the heritability of completed fertility?  
574 Evidence from two large twin studies. *Behav Genet* 2017; **47**: 36-51.
- 575 24. Alwan S, Yee IM, Dybalski M, et al. Reproductive decision making after the diagnosis of  
576 multiple sclerosis (MS). *Mult Scler J* 2013; **19**: 351-358.
- 577 25. Currie J, Schwandt H. Short-and long-term effects of unemployment on fertility. *PNAS*  
578 2014; **111**: 14734-14739.
- 579 26. Coomarasamy A, Dhillon-Smith RK, Papadopoulou A, et al. Recurrent miscarriage:  
580 evidence to accelerate action. *Lancet* 2021; **397**: 1675-1682.
- 581 27. Hull MGR. Epidemiology of infertility and polycystic ovarian disease: endocrinological  
582 and demographic studies. *Gynecol Endocrinol* 1987; **1**: 235-245.
- 583 28. Bulletti C, Coccia ME, Battistoni S, Borini A. Endometriosis and infertility. *J Assist*  
584 *Reprod Genet* 2010; **27**: 441-447.

- 585 29. Purewal, S., Chapman, S., Czuber-Dochan, W., Selinger, C., Steed, H. and Brookes, M.J.,  
586 2018. Systematic review: the consequences of psychosocial effects of inflammatory bowel  
587 disease on patients' reproductive health. *Alimentary Pharmacology & Therapeutics*, 48(11-  
588 12), pp.1202-1212.
- 589 30. Lee, H.H., Bae, J.M., Lee, B.I., Lee, K.M., Wie, J.H., Kim, J.S., Cho, Y.S., Jung, S.A.,  
590 Kim, S.W., Choi, H. and Choi, M.G., 2020. Pregnancy outcomes in women with  
591 inflammatory bowel disease: a 10-year nationwide population-based cohort study.  
592 *Alimentary pharmacology & therapeutics*, 51(9), pp.861-869.
- 593 31. Ferraro, D., Simone, A.M., Adani, G., Vitetta, F., Mauri, C., Strumia, S., Senesi, C.,  
594 Curti, E., Baldi, E., Santangelo, M. and Montepietra, S., 2017. Definitive childlessness in  
595 women with multiple sclerosis: a multicenter study. *Neurological Sciences*, 38, pp.1453-  
596 1459.
- 597 32. Power RA, Kyaga S, Uher R, et al. Fecundity of patients with schizophrenia, autism,  
598 bipolar disorder, depression, anorexia nervosa, or substance abuse vs their unaffected  
599 siblings. *JAMA Psychiatry* 2013; **70**: 22-30.
- 600 33. Lawn, R.B., Sallis, H.M., Taylor, A.E., Wootton, R.E., Smith, G.D., Davies, N.M.,  
601 Hemani, G., Fraser, A., Penton-Voak, I.S. and Munafo, M.R., 2019. Schizophrenia risk  
602 and reproductive success: a Mendelian randomization study. *Royal Society Open Science*,  
603 6(3), p.181049.
- 604 34. Mills MC, Tropf FC. The biodemography of fertility: a review and future research  
605 frontiers. *KZfSS Kölner Zeitschrift für Soziologie und Sozialpsychologie* 2015; **67**: 397-  
606 424.
- 607 35. Tanturri ML, Mills MC, Rotkirch A, et al. State-of-the-art report: Childlessness in  
608 Europe. *Fam Soc* 2015; **32**: 1-53.
- 609 36. Goldscheider, F.K. and Kaufman, G., 1996. Fertility and commitment: Bringing men  
610 back in. *Population and Development Review*, 22, pp.87-99.
- 611 37. Pruitt DW, Tsai T. Common medical comorbidities associated with cerebral palsy. *Phys*  
612 *Med Rehabil Clin N Am* 2009; **20**: 453-467.
- 613 38. Alias H, Morthy SK, Zakaria SZS, Muda Z, Tamil AM. Behavioral outcome among  
614 survivors of childhood brain tumor: a case control study. *BMC Pediatr* 2020; **20**: 1-10.

- 615 39. Broberg G, Roll-Hansen N, eds. Eugenics and the welfare state: Norway, Sweden,  
616 Denmark, and Finland. East Lansing: *Michigan State University Press*, 2005.
- 617 40. Wei L, MacDonald T, Shimi S. Association between prior appendectomy and/or  
618 tonsillectomy in women and subsequent pregnancy rate: a cohort study. *Fertil Steril* 2016;  
619 **106**: 1150-1156.
- 620 41. Jonasson, JM, Brismar K, Sparen P, et al. Fertility in women with type 1 diabetes: a  
621 population-based cohort study in Sweden. *Diabetes care* 2007. **30**: 2271-2276.
- 622 42. Miettinen, A., 2010. Voluntary or involuntary childlessness? Socio-demographic factors  
623 and childlessness intentions among childless Finnish men and women aged 25-44. *Finnish*  
624 *Yearbook of Population Research*, pp.5-24.
- 625 43. Lloyd ME, Carr M, McElhatton P, Hall GM, Hughes RA. The effects of methotrexate on  
626 pregnancy, fertility and lactation. *QJM* 1999; **92**: 551-563.
- 627 44. Agarwal, A., Mulgund, A., Hamada, A. and Chyatte, M.R., 2015. A unique view on male  
628 infertility around the globe. *Reproductive biology and endocrinology*, 13(1), pp.1-9.
- 629 45. Esteve, A., Cortina, C. and Cabré, A., 2009. Long term trends in marital age homogamy  
630 patterns: Spain, 1922-2006. *Population*, 64(1), pp.173-202.
- 631 46. Keizer R, Dykstra PA, Jansen MD. Pathways into childlessness: Evidence of gendered  
632 life course dynamics. *J Biosoc Sci* 2008; **40**: 863-878.
- 633 47. Furu K, Kieler H, Haglund B, et al. Selective serotonin reuptake inhibitors and  
634 venlafaxine in early pregnancy and risk of birth defects: population based cohort study and  
635 sibling design. *BMJ* 2015; **350**: 1798.
- 636 48. Obel C, Zhu JL, Olsen J, et al. The risk of attention deficit hyperactivity disorder in  
637 children exposed to maternal smoking during pregnancy a re-examination using a sibling  
638 design. *J Child Psychol Psychiatry* 2016; **57**: 532-537.
- 639 49. Spektorowski, A. and Mizrachi, E., 2004. Eugenics and the welfare state in Sweden: The  
640 politics of social margins and the idea of a productive society. *Journal of Contemporary*  
641 *History*, 39(3), pp.333-352.
- 642 50. Stern, A.M., 2016. Eugenic nation: Faults and frontiers of better breeding in modern  
643 America (Vol. 17). Univ of California Press.

- 644 51. Pfaller, B., Sathananthan, G., Grewal, J., Mason, J., D’Souza, R., Spears, D., Kiess, M.,  
645 Siu, S.C. and Silversides, C.K., 2020. Preventing complications in pregnant women with  
646 cardiac disease. *Journal of the American College of Cardiology*, 75(12), pp.1443-1452.
- 647 52. Verweij, R.M., Stulp, G., Snieder, H. and Mills, M.C., 2021. Explaining the Associations  
648 of Education and Occupation with Childlessness: The Role of Desires and Expectations to  
649 Remain Childless. *Population Review*, 60(2), pp.166-194.
- 650 53. Rybińska, A. and Morgan, S.P., 2019. Childless expectations and childlessness over the  
651 life course. *Social Forces*, 97(4), pp.1571-1602.
- 652 54. Meador K, Reynolds MW, Crean S, Fahrbach K, Probst C. Pregnancy outcomes in  
653 women with epilepsy: a systematic review and meta-analysis of published pregnancy  
654 registries and cohorts. *Epilepsy Res* 2008; **81**: 1-13.
- 655 55. Morosow, K. and Kolk, M., 2020. How does birth order and number of siblings affect  
656 fertility? A within-family comparison using Swedish register data. *European Journal of*  
657 *Population*, 36(2), pp.197-233.
- 658 56. Surkyn, J. and Lesthaeghe, R., 2004. Value orientations and the second demographic  
659 transition (SDT) in Northern, Western and Southern Europe: An update. *Demographic*  
660 *research*, 3, pp.45-86.
- 661 57. Sobotka, T., and L. Toulemon. 2008. Overview Chapter 4: Changing family and  
662 partnership behaviour: Common trends and persistent diversity across Europe,  
663 *Demographic R*
- 664 58. Jalovaara, M., G. Neyer, G. Andersson, J. Dahlberg, L. Dommermuth, P. Fallesen, and T.  
665 Lappegård. 2018. Education, gender, and cohort fertility in the Nordic countries, *European*  
666 *Journal of Population* 35(3): 563–586. doi:<https://doi.org/10.1007/s10680-018-9492-2>.
- 667 59. Lappegård, T., and M. Rønsen. 2013. Socioeconomic differences in multipartner fertility  
668 among Norwegian men, *Demography* 50(3): 1135–1153.  
669 doi:<https://doi.org/10.1007/s13524-012-0165-1>.
- 670 60. Kolk, M. 2019. The relationship between lifecourse accumulated income and  
671 childbearing of Swedish men and women born 1940–1970, *Stockholm Research Reports*  
672 *in Demography* 19. doi:<https://doi.org/10.17045/sthlmuni.8283368.v1>.



673 61. Jalovaara, M., L. Andersson and A. Miettinen. (2022). Parity disparity: Educational  
674 differences in Nordic fertility across parities and number of reproductive partners,  
675 *Population Studies*, 76(1): 119-136. <https://doi.org/10.1080/00324728.2021.1887506>.

676

## 677 **Online Methods**

### 678 **Study population**

679 We considered all individuals born in Finland and Sweden between 1956 and 1968 (men) or  
680 between 1956 and 1973 (women) as index persons, for whom the vast majority completed  
681 their reproductive lifespan (45 years old for women, 50 for men) by 31 December 2018 (**Fig.**  
682 **1A**). Individuals who emigrated during the study period were excluded to avoid incomplete  
683 follow-up for disease diagnoses and reproductive information. We further excluded  
684 individuals who died before the age of 16 to eliminate the impact of diseases on pre-  
685 reproductive survival. In total, we considered 1,425,640 index women (572,518 Finns and  
686 853,122 Swedes) and 1,119,380 men (463,410 Finns and 655,970 Swedes). For these index  
687 individuals, we also obtained information for parents, spouses, siblings, and children for a  
688 total of 9,305,692 individuals (3,640,464 Finns and 5,665,228 Swedes).

689

### 690 **Childlessness (main outcome)**

691 The primary reproductive outcome of this study is childlessness, defined as having no live-  
692 born children by the age 45 for women and 50 for men. For every index person, we extracted  
693 demographic information of all biological children born before 31 December 2018 in Finland  
694 from the Population Information System and in Sweden from the Multi-Generation Register.  
695 Medical birth information including stillbirth and the use of assisted reproductive techniques  
696 was obtained from the Medical Birth Register available since 1987 in Finland and 1973 in  
697 Sweden. We excluded children conceived by assisted reproductive techniques (0.3% Finland,  
698 0.8% Sweden) to control for potential confounding from social inequalities in medical help-  
699 seeking for infertility, especially during the observational period.

700

### 701 **Marriage and partnership (secondary outcome)**

702 For index individuals in Finland, we obtained their longitudinal marriage and partnership  
703 information between 11 April 1971 and 31 December 2018 from the Population Information  
704 System. In Sweden, we collected information of married couples and cohabiting unions with  
705 biological children between 1 January 1977 and 31 December 2017 from Statistics Sweden.  
706 We defined individuals as partnerless if they did not have any abovementioned marriage or  
707 partnership registered by age 45 (women) or 50 (men).

708

### 709 **Disease diagnosis (exposure)**

710 A wide variety of disease endpoints were defined by clinical expert groups<sup>62</sup>, through  
711 International Classification of Diseases (ICD) codes of version 8 (1969-1986), 9 (1987-1995  
712 in Finland, 1987-1996 in Sweden), and 10 (1996-2018 in Finland, 1997-2018 in Sweden).  
713 We collected main diagnoses (ICD codes) and admission dates for secondary healthcare  
714 inpatient hospital treatments (since 1969, but in Sweden, nation-wide coverage began in 1973  
715 for psychiatric diagnoses and 1987 for others<sup>63</sup>) and specialist outpatient visits in Finland  
716 from the Care Register for Health Care (since 1998) and in Sweden from the National Patient  
717 Register (since 2001). In Finland, we obtained cancer diagnoses (International Classification  
718 of Diseases for Oncology, 3rd Edition) and corresponding dates of diagnoses from the  
719 Finnish Cancer Registry, available since 1953. Additionally, for all individuals who died  
720 before the end of follow-up, we collected the date of death and basic, immediate, and  
721 contributing causes of death from Statistics Finland and Statistics Sweden to capture  
722 additional disease diagnoses that were missing from hospital inpatient and outpatient  
723 registers. The age of onset was defined as the first record of a disease diagnosis.

724 In total, we considered 16 disease categories, with infectious-parasitic diseases and  
725 congenital anomalies defined only in Finland and all remaining categories defined in both  
726 countries. To remove highly correlated disease diagnoses, we estimated tetrachoric  
727 correlations between every two disease endpoints using individual-level data and only kept  
728 the one with the highest prevalence if a group of disease diagnoses had tetrachoric  
729 correlations higher than 0.7. After removing highly correlated disease diagnoses, we  
730 considered 414 diseases for which we had more than 30 affected individuals in the sibling-  
731 based analysis for each sex, in Finland or Sweden.

732

### 733 **Sibling-based analysis (main analysis)**

734 There were 274,205 pairs of full-sisters (118,978 in Finland and 155,227 in Sweden) and  
735 212,849 full-brothers (97,849 in Finland and 115,000 in Sweden) among index persons (**Fig.**  
736 **1A**), which allowed us to control for potential confounding from genetic and environmental  
737 factors by performing a matched pair case-control study design (**Fig. 1B**). First, we kept only  
738 families having at least two same-sex full-siblings discordant for childlessness (at least one  
739 sibling with children and one childless). Then, within each family, we randomly selected one  
740 childless sibling as a case, and, as control, the sibling with children that was the closest for  
741 birth order with the case. Childless siblings were of similar age as siblings with children  
742 (absolute mean age difference=0.3 (SD=4.0) and 0.5 (4.4) for full-sisters and full-brothers,  
743 respectively). Finally, within each sibling pair, for both the case and the control, we only  
744 considered disease diagnoses that had their onset at least one year before the age at first birth  
745 for the sibling with children, to eliminate the impact of diseases triggered by pregnancy. With  
746 the matched design, we excluded diseases diagnosed after the reproductive lifespan in order  
747 to avoid reverse causation. We used a conditional logistic regression model to investigate the  
748 association between a disease and childlessness. Full siblings were likely to share  
749 environmental factors, especially during the pre-reproductive period. Therefore, we only  
750 adjusted for birth year effects. A similar model was used to calculate the association between  
751 diseases and singlehood. We applied Bonferroni correction ( $P=0.05/328=1.5\times 10^{-4}$  for  
752 women,  $0.05/325=1.5\times 10^{-4}$  for men, where 328 and 325 are the numbers of unique diseases  
753 considered in women and men, respectively) to control for the familywise error rate.

754 Additionally, for disease diagnoses that were significantly associated with childlessness, we  
755 assessed whether there were any age-of-onset-dependent effects by considering the age of  
756 onset (8 groups  $\leq 15$ , 16-20, 21-25, 26-30, 31-35, 36-40, 41-45, or unaffected for both sexes  
757 and an additional group (46-50) for men) as fixed effects. For individuals with children, we  
758 further assessed whether the effects of disease diagnoses were consistent across parities by  
759 comparing childless individuals to their siblings with one child, two children, or more than  
760 two children.

761

## 762 **Population-based analysis (secondary analysis)**

763 To estimate the population-level effect of diseases on childlessness we performed a nested  
764 incident-matched case-control design which matched each childless case to one control based  
765 on sex, birth year, municipality of birth (545 from Finland and 1,091 from Sweden), and the

766 highest parental education level (International Standard Classification of Education 1997)  
767 (**Supplementary Materials p 52**). Parental education level was used instead of the index  
768 person education level to avoid confounding between an individual's educational attainment  
769 and medical conditions<sup>32</sup>. We used conditional logistic regression analysis with no additional  
770 covariates in the model. In total, we used 226,860 matched pairs of women (107,375 in  
771 Finland and 119,485 in Sweden) and 274,941 of men (127,689 in Finland and 147,252 in  
772 Sweden) for the population-based analysis.

773

#### 774 **Number of unborn children and completed fertility rate reduction related to disease** 775 **diagnoses**

776 To quantify the total fertility deficit related to diseases, for the studied cohort, we calculated  
777 the total number of unborn children per 100,000 people and partitioned the total fertility rate  
778 (TFR) as the sum of disease and non-disease age-specific fertility rates for each sex  
779 (**Supplementary Materials p 46**).

780

#### 781 **Mediation effect by singlehood**

782 To assess the role that partnership formation plays in mediating the observed associations, we  
783 performed a causal mediation analysis<sup>64</sup> to partition the association between disease diagnosis  
784 and childlessness into indirect (mediated by singlehood) and direct components  
785 (**Supplementary Materials p 46**).

786

#### 787 **Sensitivity analysis**

788 First, to eliminate the impact of diseases on reproductive age mortality, we used the sibling  
789 design framework described above but restricted the analysis to 66,255 full-sister pairs  
790 (33,556 in Finland and 32,699 in Sweden) alive by age 45 and 66,009 full-brother pairs  
791 (32,996 in Finland and 33,013 in Sweden) alive by age 50. Second, we used the sibling  
792 design framework described above but instead of conditional logistic regression we  
793 performed a stratified Cox proportional hazards regression model considering chronological  
794 age as the time scale and disease status as a time (age) varying exposure (unaffected until  
795 disease onset and affected afterward). Follow-up started at age 16, the estimated start of the  
796 reproductive lifespan, and was censored at death or one year before the age at first birth of the

797 control, whichever occurs first. Third, to quantify to what extent the identified associations  
798 between diseases and childlessness were mediated by social characteristics such as  
799 educational attainment, we further adjusted for individual's highest education level for both  
800 sibling- and population-based analyses.

801

## 802 **References for Methods**

803 62. Kurki et al. FinnGen: Unique genetic insights from combining isolated population and  
804 national health register data. *medRxiv* 2022-03.

805 63. Ludvigsson JF, Andersson E, Ekbom A. External review and validation of the Swedish  
806 national inpatient register. *BMC Public Health* 2011; **11**: 1-16.

807 64. Kim YM, Cologne JB, Jang E, et al. Causal mediation analysis in nested case-control  
808 studies using conditional logistic regression. *Biom J* 2020; **62**: 1939-1959.

809

## 810 **Acknowledgments**

811 This work was supported by the European Research Council (835079, 945733), The  
812 Leverhulme Trust, Leverhulme Centre for Demographic Science and ESRC/UKRI  
813 (ES/W002116/1). The computations for the Swedish data were enabled by resources in  
814 project sens2019018 provided by the Swedish National Infrastructure for Computing (SNIC)  
815 at UPPMAX, partially funded by the Swedish Research Council through grant agreement no.  
816 2018-05973. We thank Therese Andersson (Karolinska Institutet), Amir Sariaslan (University  
817 of Helsinki), and Guosheng Su (Aarhus University) for valuable advice on statistical  
818 modeling, Gianmarco Mignogna (Massachusetts General Hospital and University of  
819 Helsinki) and David Brazel (University of Oxford) for useful discussions during project  
820 planning, and Vincent Llorens (University of Helsinki) for suggestions on disease coding and  
821 applying Cox proportional hazards regression.

## 822 **Author contributions**

823 AL, MCM, and AG designed the study and wrote the manuscript. AL conducted the  
824 statistical analysis and generated the figures and tables. ETA calculated the number of unborn  
825 children related to diseases and total fertility rates and wrote the relevant paragraph. XD  
826 helped in performing sensitivity analysis and drafted Figure S1. SJ, PV, and TK assisted in  
827 interpreting the results from a clinical standpoint. TK and ASH defined disease endpoints.  
828 SK, AG, and AL developed the R shiny application. TF and MG coordinated data application  
829 and extraction for Swedish and Finnish nationwide registers. SL contributed to the editing of  
830 socio-economic data and statistical modeling. All authors discussed the results, revised the  
831 manuscript, and had final responsibility for the decision to submit for publication.

## 832 **Competing interests**

833 We declare no competing interests.

## 834 **Data availability**

835 All results (aggregated data) can be explored on the interactive online dashboard available at  
836 <https://dsgelrs.shinyapps.io/DiseaseSpecificLRS/>. Due to data protection regulations, we are  
837 not allowed to share individual-level data directly. However, all Finnish and Swedish register  
838 data used in this study can be applied from national data agencies listed in **Supplementary**  
839 **Materials p 3**.

840
